# Supplementary material
Source: HighWire-hosted journal article supplement (https://erj.ersjournals.com/content/57/5/2003091)
Supplement: inline-supplementary-material-1 [file inline-supplementary-material-1.pdf]

## Supplementary information

FinnGen samples were genotyped with Illumina and Affymetrix arrays (Thermo Fisher Scientific, Santa Clara, CA, USA). Genotype calls were made with GenCall and zCall algorithms for Illumina and AxiomGT1 algorithm for Affymetrix chip genotyping data. Genotyping data produced with previous chip platforms were lifted over to build version 38 (GRCh38/hg38) following the protocol described here:

[dx.doi.org/10.17504/protocols.io.nqtdown](https://dx.doi.org/10.17504/protocols.io.nqtdown). Samples with sex discrepancies, missingness (> 5%), excess heterozygosity (+4SD) and non-Finnish ancestry were removed. Variants with high missingness (> 2%), deviation from Hardy–Weinberg equilibrium ( $P < 1.0 \times 10^{-6}$ ) and low minor allele count (MAC < 3) were removed. Pre-phasing of genotyped data was performed with Eagle 2.3.5 (<https://data.broadinstitute.org/alkesgroup/Eagle/>) with the default parameters, except the number of conditioning haplotypes was set to 20,000. Imputation was carried out by using the population-specific Sequencing Initiative Suomi (SISu) v3 imputation reference panel with Beagle 4.1 (version 08Jun17.d8b, [https://faculty.washington.edu/browning/beagle/b4\\_1.html](https://faculty.washington.edu/browning/beagle/b4_1.html)) as described in the following protocol: [[dx.doi.org/10.17504/protocols.io.nmndc5e](https://dx.doi.org/10.17504/protocols.io.nmndc5e)]. SISu v3 imputation reference panel was developed using the high-coverage (25–30x) whole-genome sequencing data generated at the Broad Institute of MIT and Harvard and at the McDonnell Genome Institute at Washington University, USA; and jointly processed at the Broad Institute. Variant callset was produced with Genomic Analysis Toolkit (GATK) HaplotypeCaller algorithm by following GATK best-practices for variant calling. Genotype-, sample- and variant-wise quality control was applied in an iterative manner by using the Hail framework v0.1 (<https://Github.com/hail-is/hail/releases/tag/0.2.13>, <http://Doi.org/10.5281/zenodo.2646680>). The resulting high-quality whole genome sequencing data for 3775 individuals were phased with Eagle 2.3.5 as described above. Post-imputation quality control involved excluding variants with INFO score < 0.7.

**Supplementary Table 1. The main findings of the previous GWAS studies**

| 1 <sup>st</sup> author | Trait                                                                                      | Sample size                     | Original GWAS finding |                                        | Corresponding finding in FinnGen | Corresponding finding in FinnGen (BMI adjusted) |
|------------------------|--------------------------------------------------------------------------------------------|---------------------------------|-----------------------|----------------------------------------|----------------------------------|-------------------------------------------------|
| Tempaku F[13]          | Obstructive sleep apnoea trait (AHI, change over time)                                     | 706                             | rs12415421            | beta=0.28<br>P=3.4 x 10 <sup>-8</sup>  | beta=0.032<br>P=0.38             | beta=0.048<br>P=0.26                            |
|                        |                                                                                            |                                 | rs4731117             | beta=0.28<br>P=4.4 x 10 <sup>-8</sup>  | beta=0.014<br>P=0.37             | beta= 0.019<br>P=0.29                           |
| Chen H[14]             | Obstructive sleep apnoea trait (AHI)<br>NREM AHI in men                                    | Total: 19,744<br><br>Men: 6,737 | rs12936587            | beta=0.12<br>P=1.7 x 10 <sup>-8</sup>  | beta=0.0023<br>P=0.86            | beta=0.0097<br>P=0.53                           |
| Cade B[15]             | Obstructive sleep apnoea trait (apnoea hypopnea index, average respiratory event duration) | 12,558                          | rs116791765           | beta=-0.32<br>P=1.9 x 10 <sup>-8</sup> | Not defined in the FinnGen data  | Not defined in the FinnGen data                 |
|                        |                                                                                            |                                 | rs35424364            | beta=0.03<br>P=4.9 x 10 <sup>-8</sup>  | beta=-0.014<br>P=0.51            | beta=-0.0034<br>P=0.89                          |

The main results of the previous genome-wide association studies (GWAS) and comparison to the FinnGen data findings. BMI=body mass index, AHI=apnoea-hypopnea index, NREM= non-rapid eye movement sleep.

**Supplementary Table 2. The prospective epidemiological and disease-based cohorts, and hospital biobank samples in FinnGen Data Freeze 5**

| <b>Cohort</b>              | <b>N</b>      |
|----------------------------|---------------|
| Auria Biobank              | 22729         |
| Biobank of Central Finland | 1470          |
| Biobank of Eastern Finland | 6495          |
| Blood Service Biobank      | 29047         |
| Borealis Biobank           | 5441          |
| Biobank Botnia             | 6691          |
| Biobank Corogene           | 4753          |
| Biobank FinHealth          | 5770          |
| Helsinki Biobank           | 45481         |
| Tampere Biobank            | 7430          |
| Terveystalo Biobank        | 102           |
| THL Biobank FinIPF         | 203           |
| THL Biobank FINRISK 1992   | 4982          |
| THL Biobank FINRISK 1997   | 7060          |
| THL Biobank FINRISK 2002   | 7013          |
| THL Biobank FINRISK 2007   | 5185          |
| THL Biobank FINRISK 2012   | 5302          |
| THL Biobank GENERISK       | 6955          |
| THL Biobank Health 2000    | 6574          |
| THL Biobank Health 2011    | 708           |
| THL Biobank HHS            | 1981          |
| THL Biobank Kuusamo        | 128           |
| THL Biobank Migraine       | 7764          |
| THL Biobank SUPER          | 8543          |
| THL Biobank Diabetes       | 9405          |
| THL Biobank Twins          | 11578         |
| <b>Total:</b>              | <b>218792</b> |

THL= Finnish Institute for Health and Welfare Helsinki, Finland

**Supplementary Table 3. ICD-codes for OSA and comorbidities**

| Phenotype endpoint | ICD-10                                        | ICD-9                                                          | ICD-8                        |
|--------------------|-----------------------------------------------|----------------------------------------------------------------|------------------------------|
| OSA                | G47.3                                         | 3472A                                                          |                              |
| HYPERTENSION       | I10-I13, I15, I67.4                           | 4019X, 4029A, 4029B, 4039A, 4040A, 4059A, 4059B, 4372A, 4059X  | 400, 401, 402, 403, 404      |
| T2D*               | E11                                           | 250A                                                           |                              |
| CHD                | I20.0, I21, I22                               | 410, 4110                                                      | 410, 411,0                   |
| STROKE             | I61, I63, I64                                 | 431, 4330A, 4331A, 4339A, 4340A, 4341A, 4349A, 436             | 431, 433, 434, 436           |
| DEPRESSION         | F32, F33                                      | 2961, 2968                                                     | 790,20, 298,0                |
| HYPOTHYROIDISM     | E00, E01, E02, E03.0-E03.5, E03.8, E03.9      | 243, 2443, 2448, 2449, 2448A, 2448B                            | 243, 244                     |
| ASTHMA             | J45, J46                                      | 493                                                            | 493                          |
| IRD                | M05, J99.0, M06.0, M30-M35, M45, M08.0, L40.5 | 7140A, 7140B, 7141, 7100, 7431, 7101, 7340, 7200, 7143A, 6960A | 712,10, 712,4, 712,0, 696,00 |
| SNORING            | R06.5                                         |                                                                |                              |

By combining codes from different registries, we generate phenotype endpoints. Finnish national version for each International Statistical Classification of Diseases (ICD)-codes were used. These ICD-code criteria are all regular expressions for a hierarchical search. T2D\* includes also medication purchases for Anatomical Therapeutic Chemical (ATC) code A10B, Blood glucose lowering drugs, excluding insulins. At least three separate purchases were required to ensure the correct diagnosis if diabetic medication was the only evidence. OSA=obstructive sleep apnoea, T2D=type 2 diabetes, CHD=coronary heart disease, IRD= inflammatory rheumatic diseases.

**Supplementary Table 4. Characterization of five genome-wide significant OSA loci when snorers were excluded from controls in GRChb38**

| CHR | Position  | RSID        | REF | ALT | Nearest gene   | Consequence | Fin.enr. | AF     | AF cases | AF controls | INFO  | OR [95% CI]     | P-value               | P-value BMIadj        |
|-----|-----------|-------------|-----|-----|----------------|-------------|----------|--------|----------|-------------|-------|-----------------|-----------------------|-----------------------|
| 16  | 53765595  | rs9937053   | G   | A   | FTO            | intron      | 0.97     | 0.43   | 0.45     | 0.43        | 0.999 | 1.11[1.08-1.13] | $1.8 \times 10^{-16}$ | 0.03                  |
| 12  | 97359374  | rs10507084  | C   | T   | RMST/<br>NEDD1 | intergenic  | 3.03     | 0.18   | 0.19     | 0.18        | 0.993 | 1.12[1.08-1.15] | $2.4 \times 10^{-11}$ | $9.5 \times 10^{-10}$ |
| 10  | 12656440  | rs185932673 | C   | T   | CAMK1D         | intron      | 0.55     | 0.0033 | 0.0051   | 0.0032      | 0.972 | 1.85[1.49-2.30] | $3.6 \times 10^{-8}$  | $9.4 \times 10^{-6}$  |
| 9   | 125379530 | rs4837016   | G   | A   | GAPVD1         | intergenic  | 1.12     | 0.47   | 0.45     | 0.47        | 0.995 | 0.93[0.91-0.95] | $1.5 \times 10^{-8}$  | $2.0 \times 10^{-4}$  |
| 2   | 136234237 | rs10928560  | C   | T   | CXCR4          | downstream  | 1.04     | 0.20   | 0.18     | 0.20        | 0.993 | 0.92[0.89-0.95] | $4.7 \times 10^{-8}$  | $1.2 \times 10^{-4}$  |

All effect sizes and allele frequencies are reported in terms of alternate (ALT) allele. The finding of rs185932673 should be interpreted cautiously as the variant is rare in the Finnish population. OSA=obstructive sleep apnoea, GRCh38=Genome Reference Consortium Human genome build 38 coordinates, CHR=chromosome, Fin.enr=Finnish enrichment is computed using The Genome Aggregation Database (Gnomad) data comparing Finnish to other European populations in the Gnomad data. AF=allele frequency, OR=odds ratio, CI=confidence interval, P-value BMIadj=P-value after body mass index (BMI) adjustment. FTO=Fat mass and obesity-associated protein, RMST=Rhabdomyosarcoma 2 associated transcript / NEDD1=NEDD1 gamma-tubulin ring complex targeting factor, CAMK1D=Calcium/calmodulin-dependent protein kinase ID, GAPVD1= GTPase activating protein and VPS9 Domains 1, CXCR4=C-X-C motif chemokine receptor 4.

**Supplementary Table 5. Bonferroni corrected significant PheWAS findings of the five associated loci**

|                                                                                      |                 |                        |
|--------------------------------------------------------------------------------------|-----------------|------------------------|
| <b>Rs10928560</b>                                                                    |                 |                        |
| <b>Phenotype</b>                                                                     | <b>OR</b>       | <b>P-value</b>         |
| <i>Lactose intolerance</i>                                                           | 1.87[1.82-1.93] | $2.74 \times 10^{-12}$ |
| <i>Lactose intolerance, other/unspecified</i>                                        | 1.89[1.84-1.95] | $3.20 \times 10^{-11}$ |
| <i>Sleep disorders (combined)</i>                                                    | 0.92[0.89-0.94] | $6.53 \times 10^{-9}$  |
| <i>Internal derangement of knee</i>                                                  | 0.93[0.91-0.96] | $4.97 \times 10^{-6}$  |
| <i>Episodal and paroxysmal disorders</i>                                             | 0.95[0.93-0.98] | $7.18 \times 10^{-6}$  |
| <i>Arthropathies</i>                                                                 | 0.96[0.93-0.99] | $1.32 \times 10^{-5}$  |
| <i>Neurological diseases</i>                                                         | 0.96[0.93-0.99] | $1.68 \times 10^{-5}$  |
| <b>Rs4837016</b>                                                                     |                 |                        |
| <b>Phenotype</b>                                                                     | <b>OR</b>       | <b>P-value</b>         |
| <i>Sleep disorders (combined)</i>                                                    | 0.94[0.92-0.97] | $8.51 \times 10^{-7}$  |
| <b>Rs185932673</b>                                                                   |                 |                        |
| <b>Phenotype</b>                                                                     | <b>OR</b>       | <b>P-value</b>         |
| <i>Sleep disorders (combined)</i>                                                    | 1.69[1.64-1.74] | $3.81 \times 10^{-7}$  |
| <b>Rs10507084</b>                                                                    |                 |                        |
| <b>Phenotype</b>                                                                     | <b>OR</b>       | <b>P-value</b>         |
| <i>Sleep disorders (combined)</i>                                                    | 1.11[1.08-1.14] | $1.56 \times 10^{-11}$ |
| <i>Episodal and paroxysmal disorders</i>                                             | 1.05[1.02-1.08] | $8.69 \times 10^{-7}$  |
| <i>Neurological diseases</i>                                                         | 1.04[1.01-1.08] | $2.98 \times 10^{-6}$  |
| <b>Rs9937053</b>                                                                     |                 |                        |
| <b>Phenotype</b>                                                                     | <b>OR</b>       | <b>P-value</b>         |
| <i>Arthrosis related co-morbidities</i>                                              | 1.28[1.24-1.32] | $2.47 \times 10^{-44}$ |
| <i>Obesity</i>                                                                       | 1.25[1.22-1.29] | $4.14 \times 10^{-41}$ |
| <i>Obesity and other hyperalimentation</i>                                           | 1.25[1.21-1.29] | $9.05 \times 10^{-41}$ |
| <i>Other nutritional deficiencies</i>                                                | 1.23[1.19-1.27] | $1.69 \times 10^{-36}$ |
| <i>Obesity, other/unspecified</i>                                                    | 1.30[1.27-1.34] | $7.12 \times 10^{-33}$ |
| <i>Other (not insulin) diabetes medications</i>                                      | 1.14[1.10-1.17] | $6.23 \times 10^{-32}$ |
| <i>Type 2 diabetes with other specified/multiple/unspecified complications</i>       | 1.14[1.11-1.17] | $1.84 \times 10^{-28}$ |
| <i>Type 2 diabetes</i>                                                               | 1.12[1.09-1.15] | $5.67 \times 10^{-28}$ |
| <i>Type 2 diabetes, definitions combined, including primary healthcare diagnoses</i> | 1.13[1.10-1.16] | $9.09 \times 10^{-28}$ |
| <i>Type 2 diabetes, strict (exclude DM1)</i>                                         | 1.12[1.09-1.16] | $6.65 \times 10^{-27}$ |
| <i>Obesity due to excess calories</i>                                                | 1.24[1.20-1.27] | $7.79 \times 10^{-27}$ |

|                                                                                   |                 |                        |
|-----------------------------------------------------------------------------------|-----------------|------------------------|
| <i>Type 2 diabetes, definitions combined</i>                                      | 1.12[1.09-1.16] | $7.93 \times 10^{-27}$ |
| <i>Diabetes medication</i>                                                        | 1.11[1.08-1.15] | $5.62 \times 10^{-26}$ |
| <i>Diabetes mellitus</i>                                                          | 1.11[1.07-1.14] | $1.98 \times 10^{-24}$ |
| <i>Diabetes, insuline treatment (Kela reimbursement) (more controls excluded)</i> | 1.11[1.08-1.15] | $4.48 \times 10^{-24}$ |
| <i>Diabetes, insuline treatment (Kela reimbursement)</i>                          | 1.11[1.08-1.15] | $5.17 \times 10^{-24}$ |
| <i>Type 2 diabetes without complications</i>                                      | 1.15[1.12-1.19] | $2.36 \times 10^{-23}$ |
| <i>Other diabetes, wide definition</i>                                            | 1.11[1.08-1.14] | $5.29 \times 10^{-23}$ |
| <i>Diabetes, varying definitions</i>                                              | 1.1[1.07-1.13]  | $6.46 \times 10^{-23}$ |
| <i>Type 2 diabetes, wide definition</i>                                           | 1.14[1.10-1.17] | $4.59 \times 10^{-22}$ |
| <i>Diabetes 1 &amp; 2, IBD comorbidity</i>                                        | 1.11[1.08-1.14] | $8.54 \times 10^{-18}$ |
| <i>Gout-related comorbidities</i>                                                 | 1.08[1.05-1.12] | $2.77 \times 10^{-17}$ |
| <i>Sleep disorders (combined)</i>                                                 | 1.1[1.07-1.13]  | $3.31 \times 10^{-15}$ |
| <i>Rheumatological diseases related comorbidities</i>                             | 1.06[1.03-1.09] | $4.55 \times 10^{-15}$ |
| <i>Endocrine, nutritional and metabolic diseases</i>                              | 1.06[1.03-1.09] | $7.25 \times 10^{-14}$ |
| <i>ILD Comorbidities, CVD and metabolic diseases</i>                              | 1.06[1.03-1.09] | $3.23 \times 10^{-12}$ |
| <i>Comorbidities, CVD and metabolic diseases</i>                                  | 1.07[1.04-1.1]  | $5.13 \times 10^{-12}$ |
| <i>Multimorbidity, for COPD</i>                                                   | 1.05[1.02-1.08] | $2.01 \times 10^{-11}$ |
| <i>COPD comorbidities, CVD and metabolic diseases</i>                             | 1.06[1.03-1.09] | $2.06 \times 10^{-11}$ |
| <i>Hypertensive diseases</i>                                                      | 1.06[1.03-1.09] | $1.36 \times 10^{-10}$ |
| <i>Hypertensive diseases (excluding secondary)</i>                                | 1.06[1.03-1.09] | $1.36 \times 10^{-10}$ |
| <i>Hypertension</i>                                                               | 1.06[1.03-1.09] | $1.40 \times 10^{-10}$ |
| <i>Hypertension (no controls excluded)</i>                                        | 1.06[1.03-1.09] | $1.42 \times 10^{-10}$ |
| <i>ILD-related co-morbidities</i>                                                 | 1.05[1.02-1.08] | $1.85 \times 10^{-10}$ |
| <i>Gonarthrosis</i>                                                               | 1.08[1.05-1.11] | $3.34 \times 10^{-10}$ |
| <i>Arthrosis, including primary healthcare diagnoses</i>                          | 1.06[1.03-1.09] | $6.59 \times 10^{-10}$ |
| <i>Cardiovascular diseases (excluding rheumatic etc)</i>                          | 1.05[1.02-1.08] | $6.81 \times 10^{-10}$ |
| <i>Arthrosis</i>                                                                  | 1.06[1.03-1.09] | $6.90 \times 10^{-10}$ |
| <i>Gonarthrosis [arthrosis of knee]</i>                                           | 1.07[1.04-1.10] | $3.75 \times 10^{-9}$  |
| <i>Gonarthrosis, primary</i>                                                      | 1.07[1.04-1.10] | $4.25 \times 10^{-9}$  |
| <i>Hypertension, essential</i>                                                    | 1.06[1.03-1.09] | $6.76 \times 10^{-9}$  |
| <i>COPD-associated comorbidities</i>                                              | 1.04[1.01-1.07] | $8.70 \times 10^{-9}$  |
| <i>Insulin medication</i>                                                         | 1.09[1.06-1.12] | $3.84 \times 10^{-8}$  |

|                                                                            |                 |                       |
|----------------------------------------------------------------------------|-----------------|-----------------------|
| <i>Asthma associated comorbidities</i>                                     | 1.04[1.01-1.07] | $7.11 \times 10^{-8}$ |
| <i>Primary gonarthrosis, bilateral</i>                                     | 1.1[1.07-1.13]  | $1.29 \times 10^{-7}$ |
| <i>Obesity related asthma</i>                                              | 1.13[1.10-1.16] | $1.56 \times 10^{-7}$ |
| <i>Hypertension, essential (no controls excluded)</i>                      | 1.05[1.02-1.08] | $1.87 \times 10^{-7}$ |
| <i>Gonarthrosis, primary, with knee surgery</i>                            | 1.09[1.06-1.13] | $1.88 \times 10^{-7}$ |
| <i>Cardiovascular diseases</i>                                             | 1.04[1.01-1.07] | $3.50 \times 10^{-7}$ |
| <i>Antihypertensive medication - note that there are other indications</i> | 1.04[1.01-1.07] | $4.04 \times 10^{-7}$ |
| <i>Neurological diseases</i>                                               | 1.05[1.02-1.08] | $7.20 \times 10^{-7}$ |
| <i>Arthropathies</i>                                                       | 1.04[1.01-1.07] | $8.59 \times 10^{-7}$ |
| <i>Heart failure and antihypertensive medication</i>                       | 1.07[1.04-1.1]  | $1.30 \times 10^{-6}$ |
| <i>Carpal tunnel syndrome</i>                                              | 1.07[1.04-1.11] | $1.77 \times 10^{-6}$ |
| <i>Psoriatic arthropathies related comorbidities</i>                       | 1.05[1.02-1.08] | $3.64 \times 10^{-6}$ |
| <i>Diabetes, several complications</i>                                     | 1.1[1.06-1.13]  | $4.27 \times 10^{-6}$ |
| <i>Type 2 diabetes with coma</i>                                           | 1.16[1.12-1.19] | $5.56 \times 10^{-6}$ |
| <i>Extreme obesity with alveolar hypoventilation</i>                       | 1.36[1.32-1.4]  | $5.58 \times 10^{-6}$ |
| <i>Coxarthrosis,</i>                                                       | 1.07[1.04-1.11] | $5.95 \times 10^{-6}$ |
| <i>All-cause Heart Failure</i>                                             | 1.05[1.02-1.08] | $6.56 \times 10^{-6}$ |
| <i>Hypertensive Heart Disease</i>                                          | 1.12[1.09-1.15] | $6.62 \times 10^{-6}$ |
| <i>Heart failure, not strict</i>                                           | 1.05[1.02-1.08] | $7.10 \times 10^{-6}$ |
| <i>Heart failure and BMI 25plus</i>                                        | 1.05[1.02-1.08] | $7.10 \times 10^{-6}$ |
| <i>Erysipelas</i>                                                          | 1.07[1.04-1.10] | $8.41 \times 10^{-6}$ |
| <i>Type 2 diabetes with ophthalmic complications</i>                       | 1.15[1.12-1.19] | $1.63 \times 10^{-5}$ |

Significance Bonferroni corrected threshold was defined at  $P = 0.05/2925 = 1.71. \times 10^{-5}$ . OR=odds ratio [95% confidence interval]. KELA= Social Insurance Institution of Finland. DM1 = type 1 diabetes, IBD = inflammatory bowel disease, ILD = interstitial lung disease, CVD = cardiovascular disease, COPD = chronic obstructive pulmonary disease, BMI = body mass index.



**Supplementary Table 6. Mendelian randomization suggesting a strong causal relationship between BMI and OSA.**

| Method                    | number of SNPs | beta | se   | P-value                |
|---------------------------|----------------|------|------|------------------------|
| MR Egger                  | 64             | 0.35 | 0.24 | 0.15                   |
| Weighted median           | 64             | 0.64 | 0.11 | $1.53 \times 10^{-8}$  |
| Inverse variance weighted | 64             | 0.67 | 0.08 | $8.32 \times 10^{-16}$ |
| Simple mode               | 64             | 1.09 | 0.30 | $6.42 \times 10^{-4}$  |
| Weighted mode             | 64             | 1.08 | 0.26 | $1.25 \times 10^{-4}$  |

Mendelian randomization (MR) analysis uses 64 independent body mass index (BMI) associated SNPs[33] as an instrumental variable to predict obstructive sleep apnoea (OSA).

**Supplementary Table 7. Replication of the lead variants**

| RSID                | G47.3 OSA UKBB                                 | EAF UKBB | G47.3 OSA ANDIS                                | EAF ANDIS | G47.3 OSA EGCUT                                 | EAF EGCUT | G47.3 OSA Combined                              |
|---------------------|------------------------------------------------|----------|------------------------------------------------|-----------|-------------------------------------------------|-----------|-------------------------------------------------|
| <b>case/control</b> | 4471/403723                                    |          | 947/9829                                       |           | 4930/61056                                      |           | 10348/474608                                    |
| <b>rs9937053</b>    | OR=1.12 [1.07-1.17]<br>P= $5.5 \times 10^{-7}$ | 0.42     | OR=1.13 [1.03-1.24]<br>P=0.01                  | 0.46      | OR=1.06 [1.02-1.11]<br>P= $6.55 \times 10^{-3}$ | 0.48      | OR=1.09 [1.06-1.12]<br>P= $2.68 \times 10^{-9}$ |
| <b>rs10507084</b>   | OR=1.07 [0.98-1.17]<br>P=0.15                  | 0.06     | OR=0.89 [0.73-1.06]<br>P=0.18                  | 0.07      | OR=1.01 [0.94-1.09]<br>P=0.80                   | 0.09      | OR=1.02 [0.96-1.08]<br>P=0.51                   |
| <b>rs185932673</b>  | OR=0.96 [0.73-1.26]<br>P=0.74                  | 0.01     | Not defined in ANDIS                           | -         | OR=1.09[0.84-1.43]<br>P=0.52                    | 0.01      | OR=1.02[0.84-1.23]<br>P=0.82                    |
| <b>rs4837016</b>    | OR=0.97 [0.93-1.01]<br>P=0.16                  | 0.42     | OR=0.87 [0.79-0.95]<br>P= $4.6 \times 10^{-3}$ | 0.43      | OR=0.98 [0.94-1.02]<br>P=0.32                   | 0.51      | OR=0.96 [0.94-0.99]<br>P=0.01                   |
| <b>rs10928560</b>   | OR=1.00 [0.94-1.06]<br>P=0.94                  | 0.17     | OR=1.01[0.90-1.15]<br>P=0.38                   | 0.18      | OR=1.01 [0.96-1.07]<br>P=0.60                   | 0.21      | OR=1.01 [0.97-1.05]<br>P= 0.57                  |

Inverse-variance weighted meta-analysis combining the results of the replication cohorts of the main FinnGen findings considering obstructive sleep apnoea (OSA). All results are presented without BMI-adjustment.

EAF=Effect allele frequency, OR=odds ratio, [95% confidence interval], UKBB = UK Biobank, ANDIS = All New Diabetics in Scania, EGCUT = Estonian Genome Center - University of Tartu.

**Supplementary Table 8.**

|        | Model 1 |           |                       | Model 2 |           |                       |
|--------|---------|-----------|-----------------------|---------|-----------|-----------------------|
|        | OR      | CI        | P-value               | OR      | CI        | P-value               |
| OSA_Q1 | -       | -         | -                     | -       | -         | -                     |
| OSA_Q2 | 1.07    | 0.92-1.15 | 0.080                 | 1.02    | 0.95-1.10 | 0.585                 |
| OSA_Q3 | 1.09    | 1.01-1.18 | 0.029                 | 1.03    | 0.95-1.11 | 0.464                 |
| OSA_Q4 | 1.10    | 1.02-1.19 | 0.013                 | 1.00    | 0.92-1.08 | 0.966                 |
| OSA_Q5 | 1.24    | 1.15-1.33 | $6.89 \times 10^{-9}$ | 1.11    | 1.03-1.20 | $4.70 \times 10^{-3}$ |

Obstructive sleep apnoea (OSA)'s polygenic risk score (PRS) predicts OSA in the UK Biobank (UKBB) data with P-value thresholded variants ( $P < 5.0 \times 10^{-8}$ , 5 variants). Model 1 is adjusted for age, sex and 10 first principal components (PC)s. Model 2 is adjusted for body mass index (BMI) in addition to covariates of Model 1. The OSA's PRS was stratified into quintiles and OSA\_Q5 is the highest quintile. OR=odds ratio, CI = 95% confidence interval.

**Supplementary Figure 1.**

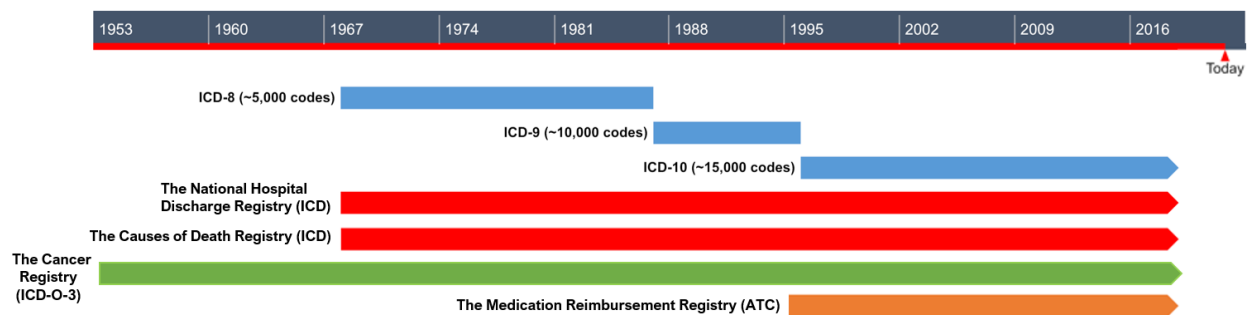

Nationwide registries combined by FinnGen. X-axis represents when a certain registry collection has started. Each arrow on Y-axis shows the origin of the ICD or ATC-code. ICD=International Statistical Classification of Diseases, ICD-O-3=International Classification of Diseases for Oncology, 3rd Edition, ATC=Anatomical Therapeutic Chemical Classification System.

**Supplementary Figure 2.**

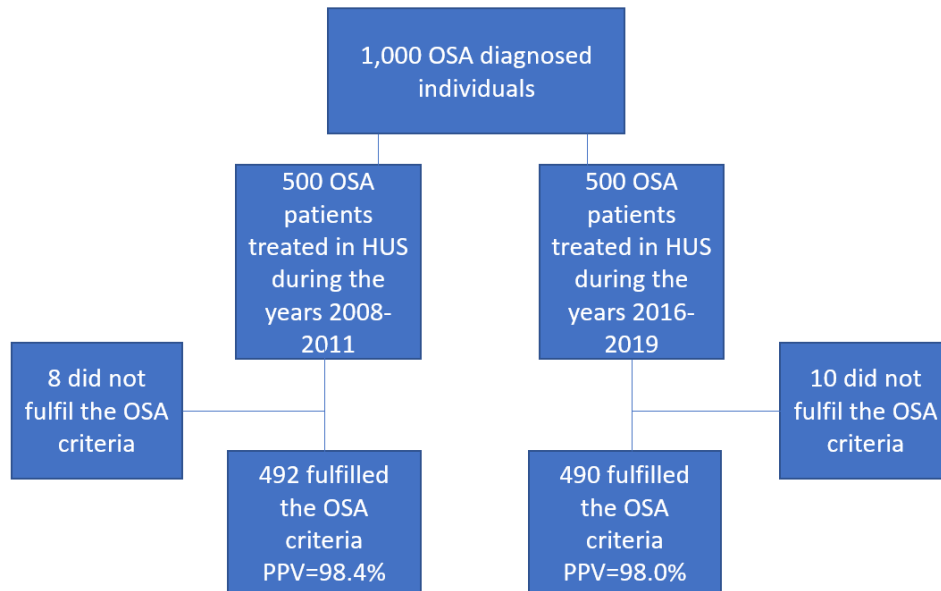

Obstructive sleep apnoea (OSA) diagnosis was validated using HUS's Hospital Discharge Registry collecting information of 1,000 patients and compared the registry data to the patient medical records. OSA diagnosis has a validity showing over 98% positive predictive value (PPV) when using International Classification criteria for Sleep Disorders for OSA [23]. AHI=apnoea-hypopnea-index, PPV=positive predictive value.

### Supplementary Figure 3.

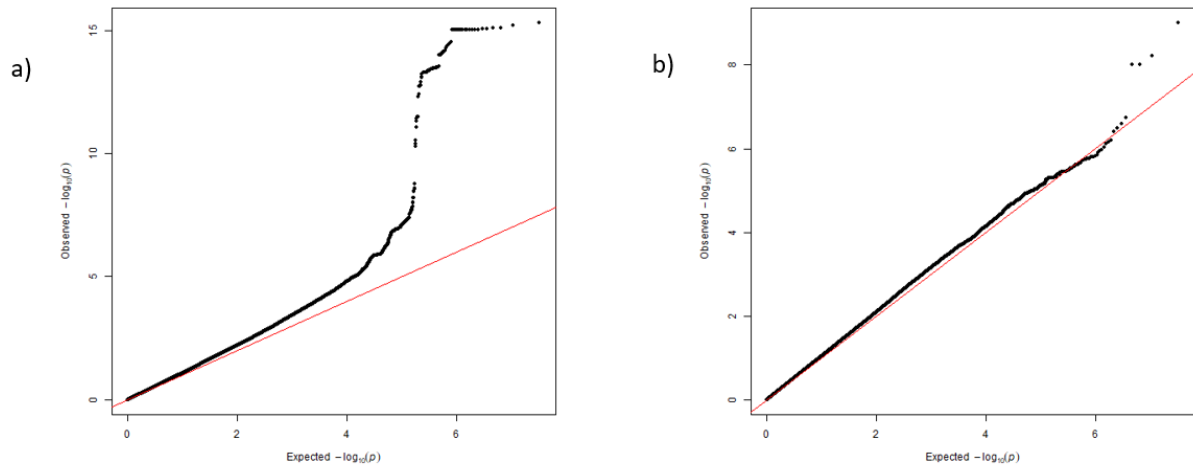

Quantile-Quantile (QQ) plot from the association analysis concerning a) obstructive sleep apnoea (OSA),  $\lambda = 1.12$ , b) body mass index (BMI) adjusted OSA,  $\lambda = 1.07$ . The observed P-values for each single nucleotide polymorphism (SNP) are sorted from largest to smallest and plotted against expected values from a theoretical  $\chi^2$ -distribution.

## Supplementary Figure 4.

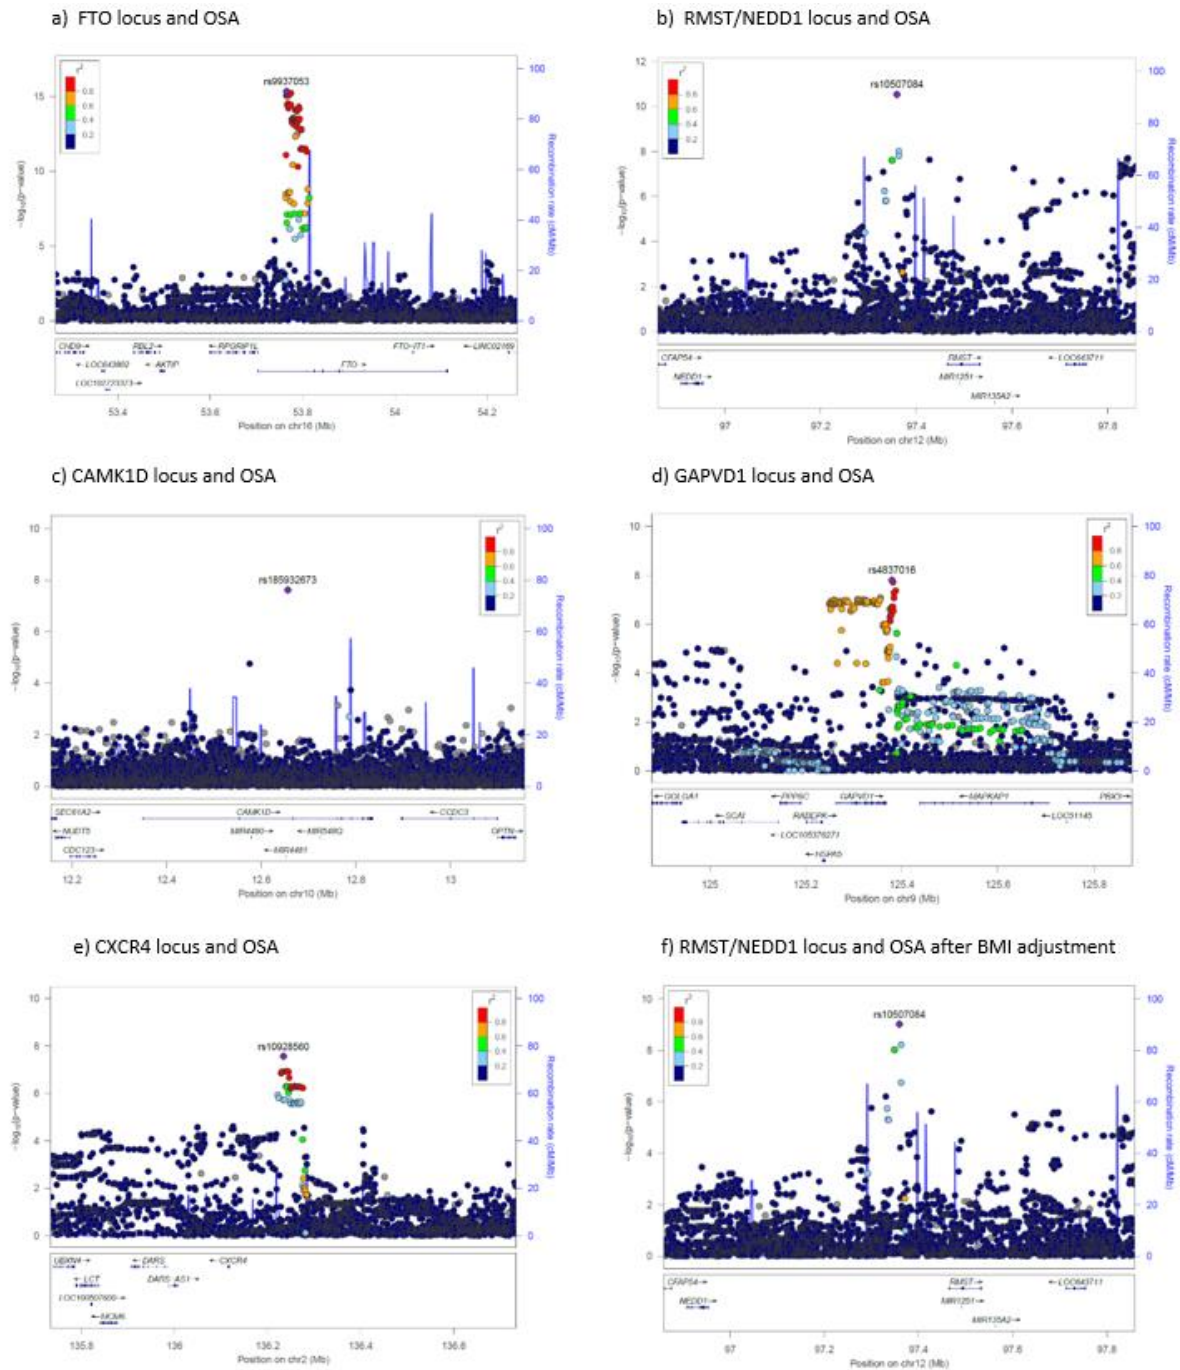

Regional plots of 5 associations. Locus Zoom plots a-f show associated P-values on the  $-\log_{10}$  scale on the vertical axis, and the chromosomal position along the horizontal axis. Purple diamonds indicate single nucleotide polymorphism (SNP) at each locus with the strongest associated evidence. Linkage disequilibrium (LD,  $r^2$  values) between the lead SNP and the other SNPs are indicated by colour. *FTO*=Fat mass and obesity-associated protein, *RMST*=Rhabdomyosarcoma 2 associated transcript / *NEDD1*=NEDD1 gamma-tubulin ring complex targeting factor, *CAMK1D*=Calcium/calmodulin-dependent protein kinase ID, *GAPVD1*= GTPase activating protein and VPS9 domains 1, *CXCR4*=C-X-C Motif chemokine receptor 4.

## Supplementary Figure 5.

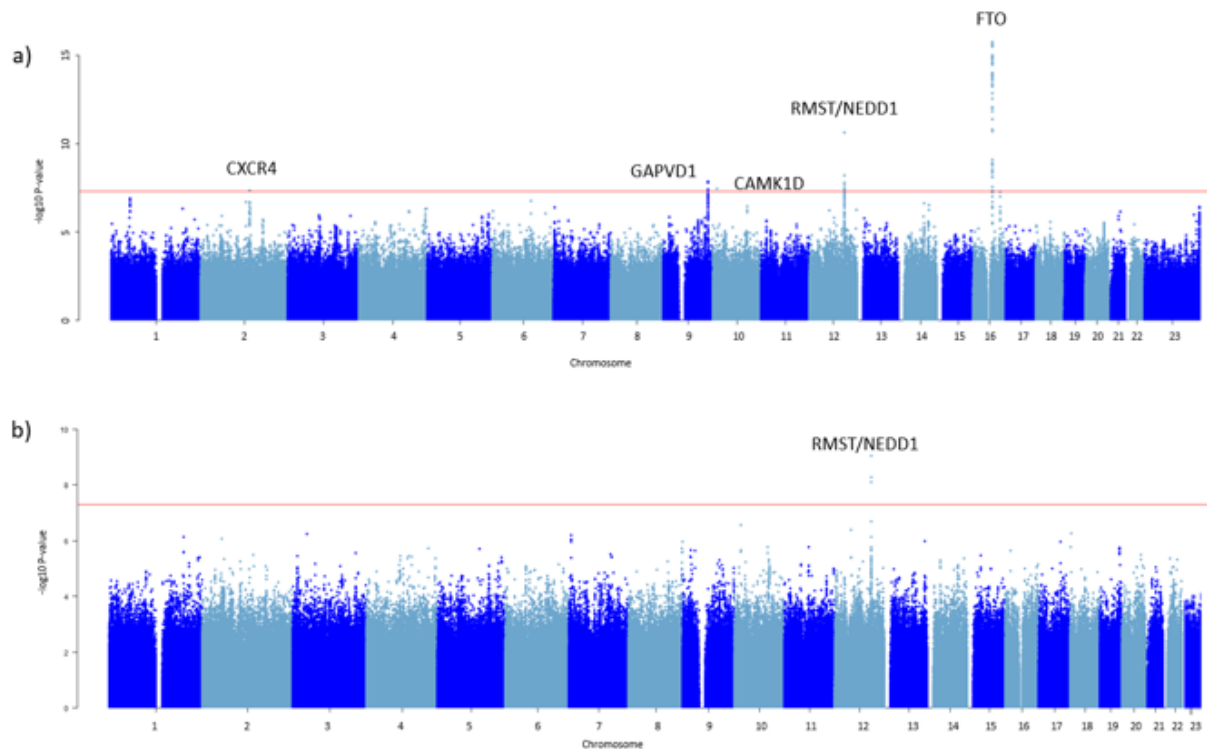

a) Manhattan plot for obstructive sleep apnoea (OSA) after excluding snorers from the control group with 16 761 OSA cases and 197 797 controls. For each genetic variant, the x-axis shows chromosomal position, while y-axis shows the  $-\log_{10}(P)$  value. The horizontal line indicates the genome-wide significance threshold of  $P = 5 \times 10^{-8}$ . Five genetic loci were identified at the genome-wide significance level. *CXCR4*=C-X-C motif chemokine receptor 4, *GAPVD1*= GTPase activating protein and VPS9 Domains 1, *CAMK1D*=Calcium/calmodulin-dependent protein kinase ID, *RMST*=Rhabdomyosarcoma 2 associated transcript / *NEDD1*=NEDD1 gamma-tubulin ring complex targeting factor, *FTO*=Fat mass and obesity-associated protein.

b) Manhattan plot for obstructive OSA after body mass index (BMI) adjustment, snorers excluded with 12 759 OSA cases and 144 583 controls. For each genetic variant, the x-axis shows chromosomal position, while y-axis shows the  $-\log_{10}(P)$  value. The horizontal line indicates the genome-wide significance threshold of  $P = 5 \times 10^{-8}$ . One genetic locus was identified at the genome-wide significance level. *RMST*=Rhabdomyosarcoma 2 associated transcript / *NEDD1*=NEDD1 gamma-tubulin ring complex targeting factor.

## Supplementary Figure 6.

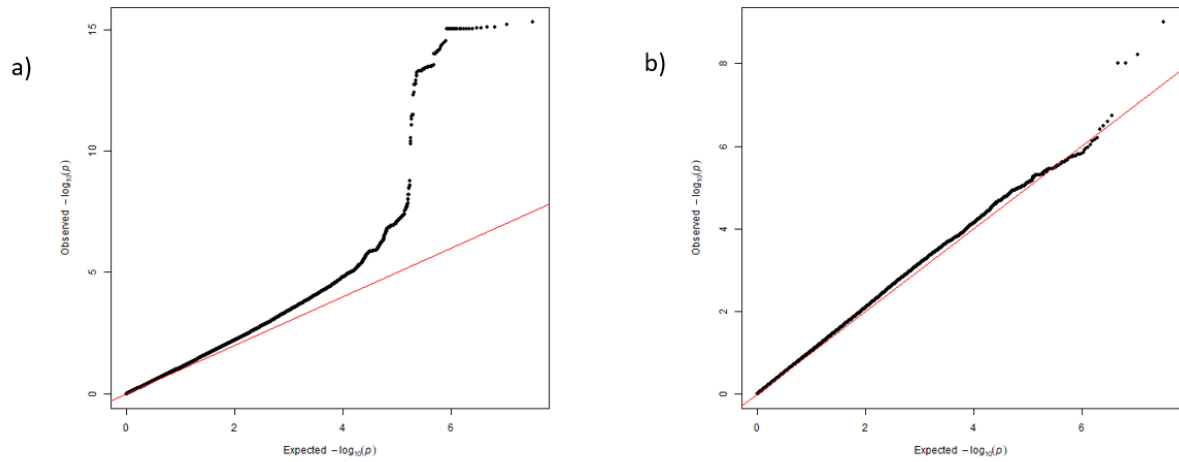

Quantile-Quantile (QQ) plot from the association analysis concerning a) obstructive sleep apnoea (OSA) after excluding snorers from the control group,  $\lambda = 1.12$ , b) body mass index (BMI) adjusted OSA after excluding snorers from the control group,  $\lambda = 1.07$ . The observed P-values for each single nucleotide polymorphism (SNP) are sorted from largest to smallest and plotted against expected values from a theoretical  $\chi^2$ -distribution.

## Supplementary Figure 7.

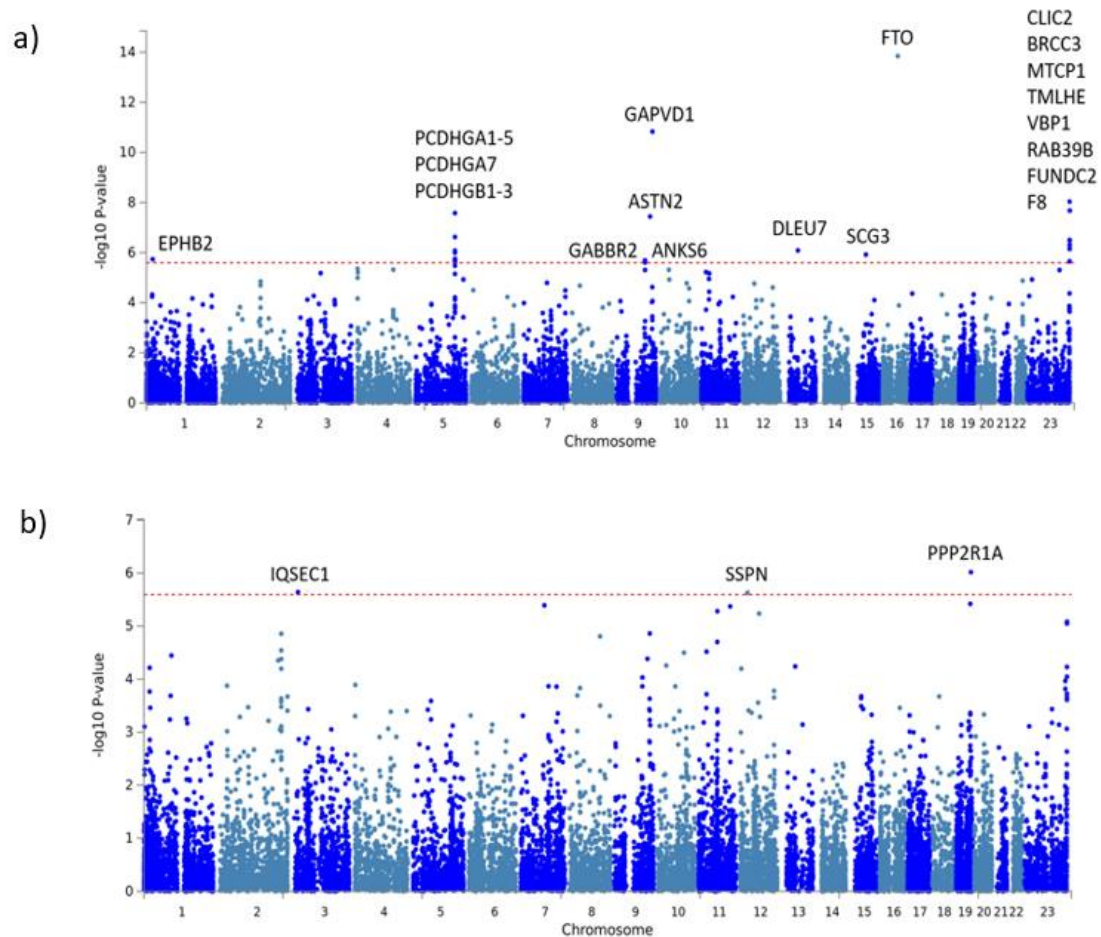

a) Manhattan plot of the gene-based test as computed by Multi-marker Analysis of GenoMic Annotation (MAGMA). Single nucleotide polymorphisms (SNPs) were mapped to 19,651 protein coding genes. Significance Bonferroni corrected threshold was defined at  $P = 0.05/19,651 = 2.54 \times 10^{-6}$ . Primarily the same genes were identified as in single variant associations. For each annotated gene x-axis shows the chromosomal position while y-axis shows the  $-\log_{10}(P)$  value.

*EPHB2*=Ephrin type-B receptor 2, *PCDHGA*=Protocadherin gamma subfamily A, *PCDHGB*=Protocadherin gamma subfamily B, *GAPVD1*=GTPase activating protein and VPS9 domains 1, *ASTN2*= Astrotactin 2, *GABBR2*=Gamma-aminobutyric acid type A receptor subunit rho2, *ANKS6*=Ankyrin repeat and sterile alpha motif domain containing 6, *DLEU7*=Deleted in lymphocytic leukemia 7, *SCG3*=Secretogranin III, *FTO*=Fat mass and obesity-associated protein, *CLIC2*=Chloride intracellular channel 2, *BRCC3*=BRCA1/BRCA2-containing complex subunit 3, *MTCP1*=Mature T cell proliferation 1, *TMLHE*=Trimethyllysine hydroxylase, epsilon, *VBP1*=VHL binding protein 1, *RAB39B*=RAB39B, member RAS oncogene family, *FUNDC2*=FUN14 domain containing 2 and *F8*= Coagulation factor VIII.

b) Manhattan plot of the gene-based test as computed by MAGMA using body mass index (BMI) adjusted GWAS data. Single nucleotide polymorphisms (SNPs) were mapped to 19,651 protein coding genes. Significance Bonferroni corrected threshold was defined at  $P = 0.05/19,651 = 2.54 \times 10^{-6}$ . For each annotated gene x-axis shows the chromosomal position while y-axis shows the  $-\log_{10}(P)$  value. *IQSEC1*= IQ motif and sec7 domain arfGEF 1, *SSPN*=Sarcospan, *PPP2R1A*= Protein phosphatase 2 scaffold subunit alpha.



## Supplementary Figure 8.

Without BMI adjustment

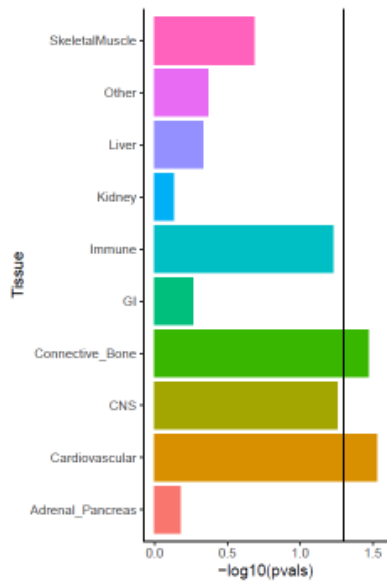

BMI adjusted data

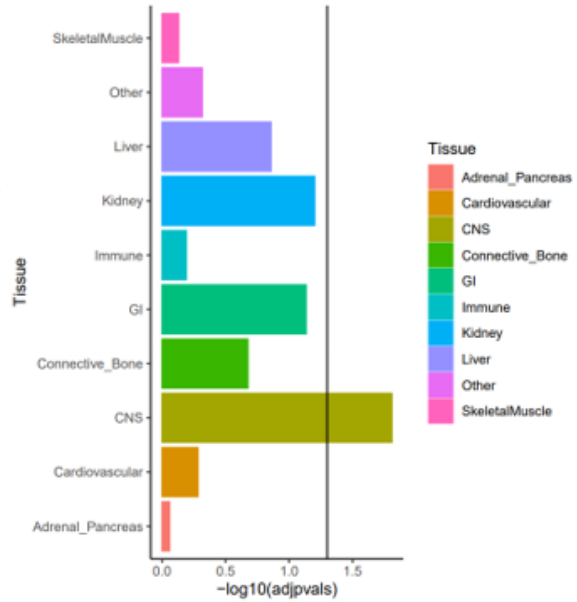

Tissue specific enrichment analysis. Stratified linkage disequilibrium (LD) score regression based on 1000 Genomes Project phase 1. LD was calculated by each tissue types. Each bar represents  $-\log_{10}$  P-value for enrichment and computed for obstructive sleep apnoea (OSA) and body mass index (BMI) adjusted OSA. CNS=central nervous system, GI=gastrointestinal.
