# Supplementary material
Source: HighWire-hosted journal article supplement (https://erj.ersjournals.com/content/57/5/2003091)
Supplement: inline-supplementary-material-2 [file inline-supplementary-material-2.pdf]

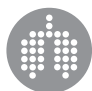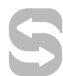

SHAREABLE PDF

# Genetic analysis of obstructive sleep apnoea discovers a strong association with cardiometabolic health

Satu Strausz<sup>1,2,3</sup>, Sanni Ruotsalainen<sup>3</sup>, Hanna M. Ollila<sup>3,4,5,6</sup>,  
Juha Karjalainen<sup>3,5,7</sup>, Tuomo Kiiskinen<sup>3,8</sup>, Mary Reeve<sup>3</sup>, Mitja Kurki<sup>3,5,7</sup>,  
Nina Mars<sup>3</sup>, Aki S. Havulinna<sup>3,8</sup>, Elina Luonsi<sup>2</sup>, Dina Mansour Aly<sup>9,10</sup>,  
Emma Ahlqvist<sup>9,10</sup>, Maris Teder-Laving<sup>11</sup>, Priit Palta<sup>12,11</sup>, Leif Groop<sup>3,9,10</sup>,  
Reedik Mägi<sup>11</sup>, Antti Mäkitie<sup>12,13</sup>, Veikko Salomaa<sup>8</sup>, Adel Bachour<sup>14</sup>,  
Tiinamaija Tuomi<sup>3,9,10,15,16</sup>, FinnGen<sup>18</sup>, Aarno Palotie<sup>3,5,7</sup>, Tuula Palotie<sup>1,2</sup> and  
Samuli Ripatti<sup>3,5,17</sup>

**Affiliations:** <sup>1</sup>Dept of Oral and Maxillofacial Diseases, Helsinki University Hospital, Helsinki, Finland. <sup>2</sup>Orthodontics, Dept of Oral and Maxillofacial Diseases, Clinicum, Faculty of Medicine, University of Helsinki, Helsinki, Finland. <sup>3</sup>Institute for Molecular Medicine Finland (FIMM), HiLIFE, University of Helsinki, Helsinki, Finland. <sup>4</sup>Dept of Psychiatry and Behavioral Sciences, Stanford University, Palo Alto, CA, USA. <sup>5</sup>Broad Institute of MIT and Harvard, Cambridge, MA, USA. <sup>6</sup>Center for Genomic Medicine, Massachusetts General Hospital, Boston, MA, USA. <sup>7</sup>Analytic and Translational Genetics Unit, Depts of Medicine, Neurology and Psychiatry, Massachusetts General Hospital, Boston, MA, USA. <sup>8</sup>Finnish Institute for Health and Welfare, Helsinki, Finland. <sup>9</sup>Lund University Diabetes Centre, Dept of Clinical Sciences, Lund University, Malmö, Sweden. <sup>10</sup>Skåne University Hospital, Lund University, Malmö, Sweden. <sup>11</sup>Estonian Genome Center, Institute of Genomics, University of Tartu, Tartu, Estonia. <sup>12</sup>Dept of Otorhinolaryngology – Head and Neck Surgery, University of Helsinki and Helsinki University Hospital, Helsinki, Finland. <sup>13</sup>Research Program in Systems Oncology, University of Helsinki, Helsinki, Finland. <sup>14</sup>Sleep Unit, Heart and Lung Center, Helsinki University Hospital, Helsinki, Finland. <sup>15</sup>Endocrinology, Abdominal Center, University of Helsinki and Helsinki University Hospital, Helsinki, Finland. <sup>16</sup>Research Program for Clinical and Molecular Medicine, University of Helsinki and Folkhälsan Research Center, Helsinki, Finland. <sup>17</sup>Dept of Public Health, University of Helsinki, Helsinki, Finland. <sup>18</sup>A list of FinnGen research group collaborators can be found in the Acknowledgements section.

**Correspondence:** Samuli Ripatti, Institute for Molecular Medicine Finland (FIMM), HiLIFE, University of Helsinki, PO Box 20, 00014 University of Helsinki, Finland. E-mail: samuli.ripatti@helsinki.fi

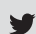

@ERSpublications

Five OSA-associated loci were found, highlighting the causal link between obesity and OSA, and providing evidence for non-BMI-dependent effects. OSA comorbidities were correlated genetically for OSA, showing these diseases may have a shared genetic basis. <https://bit.ly/36Rfq1Y>

**Cite this article as:** Strausz S, Ruotsalainen S, Ollila HM, *et al.* Genetic analysis of obstructive sleep apnoea discovers a strong association with cardiometabolic health. *Eur Respir J* 2021; 57: 2003091 [<https://doi.org/10.1183/13993003.03091-2020>].

This single-page version can be shared freely online.

**ABSTRACT** There is currently limited understanding of the genetic aetiology of obstructive sleep apnoea (OSA). We aimed to identify genetic loci associated with OSA risk, and to test if OSA and its comorbidities share a common genetic background.

We conducted the first large-scale genome-wide association study of OSA using the FinnGen study (217 955 individuals) with 16 761 OSA patients identified using nationwide health registries.

We estimated 0.08 (95% CI 0.06–0.11) heritability and identified five loci associated with OSA ( $p < 5.0 \times 10^{-8}$ ): rs4837016 near *GAPVD1* (GTPase activating protein and VPS9 domains 1), rs10928560 near *CXCR4* (C-X-C motif chemokine receptor type 4), rs185932673 near *CAMK1D* (calcium/calmodulin-

dependent protein kinase ID) and rs9937053 near *FTO* (fat mass and obesity-associated protein; a variant previously associated with body mass index (BMI)). In a BMI-adjusted analysis, an association was observed for rs10507084 near *RMST/NEDD1* (rhabdomyosarcoma 2 associated transcript/NEDD1  $\gamma$ -tubulin ring complex targeting factor). We found high genetic correlations between OSA and BMI ( $r_g=0.72$  (95% CI 0.62–0.83)), and with comorbidities including hypertension, type 2 diabetes, coronary heart disease, stroke, depression, hypothyroidism, asthma and inflammatory rheumatic disease ( $r_g>0.30$ ). The polygenic risk score for BMI showed 1.98-fold increased OSA risk between the highest and the lowest quintile, and Mendelian randomisation supported a causal relationship between BMI and OSA.

Our findings support the causal link between obesity and OSA, and the joint genetic basis between OSA and comorbidities.
